# Supplementary material for: Development and presentation of an objective risk stratification tool for healthcare workers when dealing with the COVID-19 pandemic in the UK: risk modelling based on hospitalisation and mortality statistics compared with epidemiological data
Source: HighWire-hosted journal article supplement (doi:10.1136/bmjopen-2020-042225), 2021-09-01
Supplement: bmjopen-2020-042225supp001_data_supplement.pdf [file bmjopen-2020-042225supp001_data_supplement.pdf]

**Supplementary Table 1.****Co-morbidities associated with higher mortality in international studies**

| Author<br>N in study           | Guan<br>1590 | Yang<br>46428 | Zhou<br>191 | Huang<br>41 | Chen<br>99 | Yang<br>52 | Zhang<br>140 | CDC<br>7162<br>USA | Onder<br>355<br>Italy | CSG<br>481<br>Italy |
|--------------------------------|--------------|---------------|-------------|-------------|------------|------------|--------------|--------------------|-----------------------|---------------------|
| <b>&gt;1 comorbidity</b>       | <b>25%</b>   |               | <b>48%</b>  | <b>32%</b>  | <b>51%</b> | <b>40%</b> |              | <b>38%</b>         |                       |                     |
| <b>0 comorbidity</b>           |              |               |             |             |            |            |              |                    |                       | <b>1.2%</b>         |
| <b>1 comorbidity</b>           |              |               |             |             |            |            |              |                    |                       | <b>23.5%</b>        |
| <b>2 co-morbidity</b>          |              |               |             |             |            |            |              |                    |                       | <b>26.6%</b>        |
| <b>3+ comorbidities</b>        |              |               |             |             |            |            |              |                    |                       | <b>48.6%</b>        |
| <b>Hypertension</b>            | <b>17%</b>   | <b>17%</b>    | <b>30%</b>  | <b>15%</b>  |            |            | <b>30%</b>   |                    |                       | <b>74%</b>          |
| <b>IHD</b>                     | <b>54%</b>   | <b>5%</b>     | <b>8%</b>   | <b>15%</b>  | <b>40%</b> | <b>10%</b> |              | <b>9%</b>          | <b>30%</b>            | <b>30%</b>          |
| <b>Diabetes</b>                | <b>8%</b>    | <b>5%</b>     | <b>19%</b>  | <b>20%</b>  |            | <b>9%</b>  | <b>12%</b>   | <b>11%</b>         | <b>36%</b>            | <b>34%</b>          |
| <b>Cancer</b>                  | <b>1.1%</b>  |               |             |             | <b>1%</b>  | <b>4%</b>  |              |                    | <b>25%</b>            | <b>19.5%</b>        |
| <b>Cerebrovascular disease</b> | <b>2%</b>    |               |             |             |            |            | <b>13%</b>   |                    |                       | <b>11.2%</b>        |
| <b>Respiratory disease</b>     |              | <b>2.4%</b>   |             |             | <b>1%</b>  |            | <b>0%</b>    | <b>9%</b>          |                       |                     |
| <b>COPD</b>                    | <b>1.5%</b>  |               |             |             |            | <b>8%</b>  | <b>1.4%</b>  |                    |                       | <b>14%</b>          |
| <b>Kidney disease</b>          | <b>1.3%</b>  |               |             |             |            |            |              | <b>3%</b>          |                       | <b>20%</b>          |
| <b>Immunodeficiency</b>        | <b>0.2%</b>  |               |             |             |            |            |              | <b>4%</b>          |                       |                     |
| <b>Obesity</b>                 |              |               |             |             |            |            |              | <b>0.2%</b>        |                       |                     |
